1 Bridging the gap: Using reservoir ecology and human  
2 serosurveys to estimate Lassa virus incidence in West  
3 Africa

4  
5 Andrew J. Basinski<sup>1</sup>, Elisabeth Fichet-Calvet<sup>2</sup>, Anna R. Sjodin<sup>3</sup>,  
6 Tanner J. Varrelman<sup>4</sup>, Christopher H. Remien<sup>1</sup>, Nathan C. Layman<sup>3</sup>,  
7 Brian H. Bird<sup>5</sup>, David J. Wolking<sup>5</sup>, Corina Monagin<sup>5</sup>,  
8 Bruno M. Ghersi<sup>6</sup>, Peter A. Barry<sup>7</sup>, Michael A. Jarvis<sup>8</sup>,  
9 Paul E. Gessler<sup>9</sup>, Scott L. Nuismer<sup>3</sup>

10 **1** Department of Mathematics, University of Idaho, Moscow, ID 83844, USA

11 **2** Department of Virology, Bernhard-Nocht Institute of Tropical Medicine,  
12 Hamburg 20359, Germany

13 **3** Department of Biological Sciences, University of Idaho, Moscow, ID 83844,  
14 USA

15 **4** Bioinformatics and Computational Biology, University of Idaho, Moscow, ID  
16 83844, USA

17 **5** One Health Institute, School of Veterinary Medicine, University of  
18 California, Davis, CA 95616, USA

19 **6** Department of Ecology and Evolutionary Biology, University of Tennessee,  
20 Knoxville, TN 37996, USA

21 **7** Center for Comparative Medicine, California National Primate Research  
22 Center, Department of Pathology and Laboratory Medicine, University of  
23 California, Davis, CA 95616

24 **8** School of Biomedical and Healthcare Sciences, University of Plymouth,  
25 Devon PL4 8AA, UK

26 **9** College of Natural Resources, University of Idaho, Moscow, ID 83844, USA

## 27 **1 Abstract**

28 Forecasting how the risk of pathogen spillover changes over space is essential  
29 for the effective deployment of interventions such as human or wildlife vacci-  
30 nation. However, due to the sporadic nature of spillover events, developing  
31 robust predictions is challenging. Recent efforts to overcome this obstacle have  
32 capitalized on machine learning to predict spillover risk. A weakness of these  
33 approaches has been their reliance on human infection data, which is known  
34 to suffer from strongly biased reporting. We develop a novel approach that  
35 combines sub-models for reservoir species distribution, pathogen distribution,  
36 and transmission into the human population. We apply our method to Lassa  
37 virus, a zoonotic pathogen with a high threat of emergence in West Africa. The  
38 resulting model predicts the distribution of Lassa virus spillover risk and allows  
39 us to revise existing estimates for the annual number of new human infections.  
40 Our model predicts that between 961,300 – 4,037,400 humans are infected by  
41 Lassa virus each year, an estimate that exceeds current conventional wisdom.  
42 Our model also predicts that Nigeria accounts for more than half of all new  
43 Lassa cases in humans, making it a high-risk area for Lassa virus to become an  
44 emergent pathogen.

## 45 **2 Keywords**

46 Lassa, Machine learning, zoonotic pathogen, emerging infectious disease, spillover,  
47 risk map

## 48 **3 Introduction**

49 Emerging infectious diseases (EIDs) pose a deadly threat to mankind. Approx-  
50 imately 40% of EIDs are caused by pathogens that circulate in a non-human

51 wildlife reservoir (i.e., zoonotic pathogens) [1]. Prior to full scale emergence, in-  
52 teraction between humans and wildlife creates opportunities for the occasional  
53 transfer, or spillover, of the zoonotic pathogen into human populations [2].  
54 These initial spillover cases, in turn, can give an animal-borne pathogen a  
55 foothold for genetic mutations that allow increased transmission among hu-  
56 mans [2, 3]. Consequently, a key step in preempting the threat of EIDs is  
57 careful monitoring of when and where spillover into the human population is  
58 occurring. However, because the majority of EIDs from wildlife originate in low  
59 and middle income regions with limited health system infrastructure, accurately  
60 estimating the rate and geographical range of pathogen spillover, and therefore  
61 the risk of new EIDs, is a major challenge [1].

62 Machine learning techniques have shown promise at predicting the geograph-  
63 ical range of spillover risk for several zoonotic diseases including Lassa fever [4–  
64 6], Ebola [7], and Leishmaniasis [8]. Generally, these models are trained to  
65 associate environmental features with the presence or absence of case reports  
66 in humans or the associated reservoir. Once inferred from the training process,  
67 the learned relationships between disease presence and the environment can be  
68 extended across a region of interest. Using these techniques, previous studies of  
69 Lassa fever (LF) have derived risk maps that classify areas as high or low risk  
70 [4, 5]. Though useful, these forecasts do not explicitly quantify the spillover rate  
71 of a pathogen into humans, and, as a consequence, do not reveal the relative  
72 risk of inter-species pathogen-host transmission. Furthermore, in the case of LF,  
73 due to modern transportation and the longevity of Lassa virus antibodies in hu-  
74 mans, a general concern is that the reported location of human disease or Lassa  
75 virus antibody detection is not the site at which the infection occurred [9–11].

76 Herein, we develop a multi-layer machine learning framework that accounts  
77 for the differences between how data involving a wildlife reservoir, and data

78 from human cases, inform spillover risk in people. Our approach uses machine  
79 learning algorithms that, when trained on data from the wildlife reservoir alone,  
80 estimate the likelihood of the reservoir and the zoonotic pathogen being present  
81 in an area. These predictions are combined into a composite estimate of spillover  
82 risk to humans. Estimates of human Lassa virus seroprevalence, as well as  
83 estimates of human population density, are then used to translate the composite  
84 estimate into a realized rate of zoonotic spillover into humans. We apply our  
85 framework to Lassa virus (formally *Lassa mammarenavirus* [LASV]), a negative  
86 sense, bi-segmented, single-stranded ambisense RNA virus in the *Arenaviridae*  
87 family and the causative agent of LF in West Africa [10, 12]. Though LASV can  
88 transmit directly between humans and often does so in hospital settings [13],  
89 rodent-to-human transmission is believed to account for the majority of new  
90 LASV infections [10, 14]. LASV spreads to humans from its primary reservoir,  
91 the multimammate rat *Mastomys natalensis*, through food contaminated with  
92 infected rodent feces and urine, as well as through the hunting of rodents for  
93 food consumption [15]. Because *M. natalensis* have limited dispersal relative to  
94 humans, direct LASV detection in the rodents is likely to indicate actual areas  
95 of spillover risk.

96 We use our model to update estimates of the annual rate of LASV spillover  
97 into humans. Data from longitudinal serosurveys has been used to estimate  
98 that between 100000 and 300000 LASV infections occur each year, and that  
99 between 74 – 94% of LASV infections result in sub-clinical febrile illness or  
100 are asymptomatic [16]. Though these estimates are often used to describe the  
101 magnitude of LASV spillover into humans [10, 17, 18], their generality is unclear  
102 because they are based on extrapolation from serosurveys conducted in the  
103 1980's in Sierra Leone [16]. More recent estimates indicate that as many as 13  
104 million LASV infections may occur each year [19]. Using our machine learning

105 framework to account for data from both rodents and humans, we endeavored  
106 to refine these estimates of total LASV spillover into humans.

## 107 4 Methods

108 We developed a model that predicts the rate of LASV infection in humans  
109 within individual  $0.05^\circ \times 0.05^\circ$  areas (i.e., pixels) of a gridded region of West  
110 Africa. This focal region is chosen as the intersection of West Africa and the  
111 International Union for Conservation of Nature (IUCN) range map for *Mastomys*  
112 *natalensis* [20]. Our *M. natalensis* capture data, as well as all of the LASV  
113 survey data, originate from within this region, thus providing a discrete bound  
114 on the area of West Africa in which the learned relationships of the model apply.

115 Outputs from the model are generated in two stages. The first stage uses  
116 environmental features to estimate different layers of LASV spillover risk (see  
117 Appendix for a complete list of environmental variables). The layers of risk, in  
118 turn, are described by: 1)  $D_M$ , a classification score indicating the likelihood  
119 that a pixel contains the primary rodent reservoir, *M. natalensis*, and 2)  $D_L$ ,  
120 a score indicating the likelihood that LASV circulates within the *M. natalen-*  
121 *sis* population. Depending on the layer, the response variable for this stage is  
122 generated from documented occurrences of *M. natalensis* ( $D_M$  layer), or evi-  
123 dence of past LASV infection in *M. natalensis* ( $D_L$  layer). More details on the  
124 data-sets can be found in the Appendix. The second stage of our framework  
125 uses a generalized linear model to regress the estimates of human LASV sero-  
126 prevalence onto a composite layer made from  $D_M$  and  $D_L$ . Lastly, we used a  
127 susceptible-infected-recovered model to derive human incidence from the pre-  
128 dictions of LASV seroprevalence.

## 129 4.1 LASV risk layers

130 Each risk layer of the first stage is generated by a separate boosted classification  
131 tree (BCT). The BCT, in turn, uses environmental features within a pixel to  
132 infer a classification score, between zero and one, that indicates how likely it is  
133 that the pixel is positive for *M. natalensis* ( $D_M$  layer) or LASV in *M. natalensis*  
134 ( $D_L$  layer). BCTs use a stage-wise learning algorithm that, at each stage,  
135 trains a new tree model to the residuals of the current model iteration. Each  
136 newly fitted tree is added to the ensemble model, thereby reducing the residual  
137 deviance between the model predictions and a training set [21]. Boosted trees  
138 are commonly used in species and disease distribution models because they are  
139 simultaneously resistant to over-fitting in scenarios where many feature variables  
140 are implemented and are also able to model complex interactions of the features  
141 [22].

142 In the  $D_M$  layer, fitting the BCT model requires supplementing the presence-  
143 only data with background points, also called pseudo-absences [23, 24]. Back-  
144 ground points serve as an estimate of the distribution of sampling effort for  
145 the organism being modeled [25]. We used background points chosen from  
146 capture locations of members within the Muridae family (i.e., rodents) in West  
147 Africa [26]. We only included background points that: 1) document the location  
148 of a species other than *M. natalensis*, 2) fall outside of any pixel that contains  
149 a documented *M. natalensis* capture, and 3) are within the study region. Be-  
150 cause our data-set contains locations in which LASV was present in sampled  
151 *M. natalensis* populations, as well as locations in which LASV was not found,  
152 background points were not used in the  $D_L$  layer. For both layers, each pixel in  
153 the data-set was assigned a value of zero (for background or survey absences)  
154 or one (presences). To help the models reliably discriminate between locations  
155 of presence and absence, each model was fit with an equal number of absences

156 and presences [24].

157 For a given training set, we fit the BCT model using the `gbm.step` function  
158 of the “`dismo`” package in the statistical language R [27]. This specific function  
159 uses 10-fold cross-validation to determine the number of successive trees that  
160 best model the relationship between response and features without over-fitting  
161 the data [27]. The learning rate parameter, which determines the weight given to  
162 each successive tree, was set to small values ( $D_M$ :  $10^{-2}$ ,  $D_L$ :  $10^{-3}$ ) that encour-  
163 age a final model that is composed of many small incremental improvements.  
164 A smaller learning rate was used in the  $D_L$  layer because the corresponding  
165 data-set was smaller. The parameter that describes the maximum number of  
166 allowable trees was set to a large value ( $10^7$ ) to ensure that the cross-validation  
167 fitting process was able to add trees until no further improvement occurred [21].

168 Each fitted model assigns a score between zero and one that indicates whether  
169 a given set of environmental features describes a presence or absence. To ensure  
170 that the relationships the model finds are robust, we bootstrapped the fitting  
171 procedure 25 times, sampling a different set of training points each time.

## 172 **4.2 Connection to human seroprevalence and incidence**

173 We combined the  $D_M$  and  $D_L$  layers into a composite feature, denoted by  $D_X$ ,  
174 that is indicative of whether a pixel simultaneously has environmental features  
175 that are suitable for *M. natalensis*, as well as LASV in *M. natalensis*. The  
176 combined feature is defined as  $D_X = D_M \times D_L$  and summarizes the realized  
177 risk of LASV spillover to humans within the local environment.

178 To connect the new risk parameter  $D_X$  to human LASV seroprevalence,  
179 we assume that the seroprevalence measures that were obtained from histori-  
180 cal serosurveys describe LASV infection at steady-state (i.e. are unchanging in  
181 time). We then regressed counts of seropositive humans on the  $D_X$  layer, as

182 well as an intercept, and included an offset term that accounts for the number  
183 of individuals tested. We used negative binomial regression because preliminary  
184 analyses indicated significant over-dispersion of the residuals under Poisson re-  
185 gression [28].

186 Finally, a susceptible-infected-recovered (SIR) model was used to estimate  
187 the combined number of asymptomatic and symptomatic human LASV infec-  
188 tions per year (i.e., incidence). This estimate was derived from the predicted  
189 human LASV seroprevalence described above (details in Appendix). For ref-  
190 erence, we also calculated human LASV incidence from a simpler null model  
191 that assumes a spatially homogeneous distribution of seroprevalence. Though  
192 the epidemiological characteristics of LASV infection in humans are still being  
193 clarified, at least some longitudinal data indicates that loss of seropositivity  
194 and subsequent reinfection with LASV is possible [16]. In the SIR setting, this  
195 implies a nonzero rate of recovered individuals becoming susceptible. We used  
196 the SIR model to explore the implications of a range of possible seroreversion  
197 rates on our estimates of LASV incidence. Specifically, we compared the pre-  
198 dicted incidence of LASV given no seroreversion, to the predicted incidence when  
199 seroreversion occurs at a rate  $\lambda = 0.064$  per year, as estimated by McCormick,  
200 Webb, Krebs (1987).

## 201 5 Results

### 202 5.1 LASV risk layers

203 Figure 1a shows each of the fitted risk layers (top row), as well as the com-  
204 bined layer of realized risk,  $D_X$ . The risk layers were produced by averaging 25  
205 bootstrapped predictions. As indicated by the IUCN range map for *M. natal-*  
206 *ensis* [20], all West Africa countries likely harbor this primary rodent reservoir



207 of LASV (Figure 1a). Figure 1b shows the predicted classification score for the  
208 occurrence of LASV in *M. natalensis*, averaged over 25 bootstrapped predic-  
209 tions. Similar to other Lassa risk maps [4, 5], our map indicates that the risk of  
210 LASV in rodents is primarily concentrated in the eastern and western extremes  
211 of West Africa. The combined risk, shown in Figure 1c, indicates that environ-  
212 mental features suitable for rodent-to-human LASV transmission are primarily  
213 located in Sierra Leone, Guinea, and Nigeria. Regions of central West Africa  
214 are also at moderate risk.

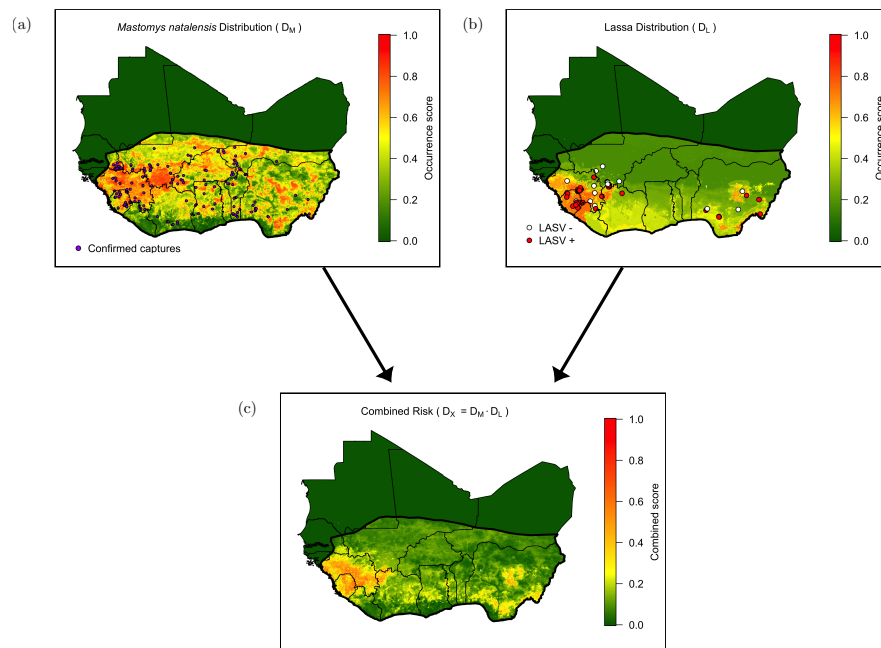

Figure 1: (a) map shows the likelihood that each  $0.05^\circ$  pixel in West Africa contains the primary reservoir of Lassa virus, *M. natalensis*. Purple dots indicate locations of captures that were confirmed using molecular techniques and were used to train the model. Black line indicates the IUCN *M. natalensis* range map. (b) predicted distribution of Lassa virus in *M. natalensis*. Dots indicate locations in which *M. natalensis* were surveyed for the virus. (c) combined risk, defined as the product of the above two layers.

## 215 5.2 Connection to human seroprevalence and incidence

216 We found a significant, positive association between the combined LASV risk  
217 predictor  $D_X$ , and the human LASV seroprevalence measured in serosurveys  
218 ( $p = 0.0145$ ). The fitted model has a McFadden's pseudo r-squared value of  
219 0.18, indicating a moderate ability to explain variation in human seroprevalence  
220 data. By applying the general linear model to the combined LASV risk layer, we  
221 extrapolate the human LASV seroprevalence across West Africa (Fig 2). Our  
222 results indicate that human LASV seroprevalence is greatest in the eastern and  
223 western regions of West Africa, with especially high seroprevalence in central  
224 Guinea, Sierra Leone, and Nigeria.

225 Furthermore, by assuming that our predictions are representative of LASV  
226 infection at steady-state, we derived the number of LASV cases per year in  
227 humans (see Appendix for derivation). If the human LASV seroprevalence is  
228 assumed homogeneous in the study region, and equal to the average seropreva-  
229 lence across all available serosurveys (18.4%), our model implies 1,380,400 LASV  
230 infections occur in humans each year. When LASV reinfection (i.e., LASV in-  
231 fection following seroreversion) is included in the model, the estimate increases  
232 to 5,797,600 cases per year. In contrast, if LASV seroprevalence in humans  
233 is spatially heterogeneous, and spatial heterogeneity is described by the LASV  
234 spillover risk layer  $D_X$ , our model estimates that 961,300 – 4,037,400 new human  
235 infections occur each year. Table 1 shows the number of LASV infections per  
236 year by country, ordered by number of cases, when reinfection is assumed not  
237 to occur. Inclusion of reinfection does not change the ranking of countries. Our  
238 results indicate that more than half of new human LASV infections (531,500)  
239 in West Africa will occur in Nigeria (Fig 3). This distribution of LASV in-  
240 fection is largely due to the greater population size within Nigeria, as the per  
241 person incidence rates do not differ dramatically between countries (Table 1).

242 After Nigeria, Ghana (73,700 cases per year) and the Ivory Coast (64,400 cases  
243 per year), respectively, are predicted to have the highest incidence of human  
244 LASV infections. Guinea and Sierra Leone are predicted to have the highest  
245 per-capita rates of LASV infection (Table 1), but because of their relatively  
246 small population sizes, these countries are predicted to have relatively few total  
247 cases.

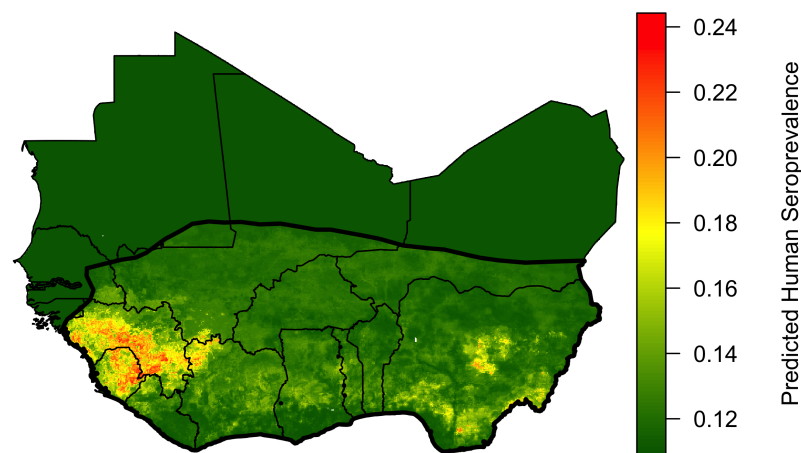

Figure 2: Predicted human seroprevalence of Lassa virus in West Africa, averaged over 25 bootstrap iterations.

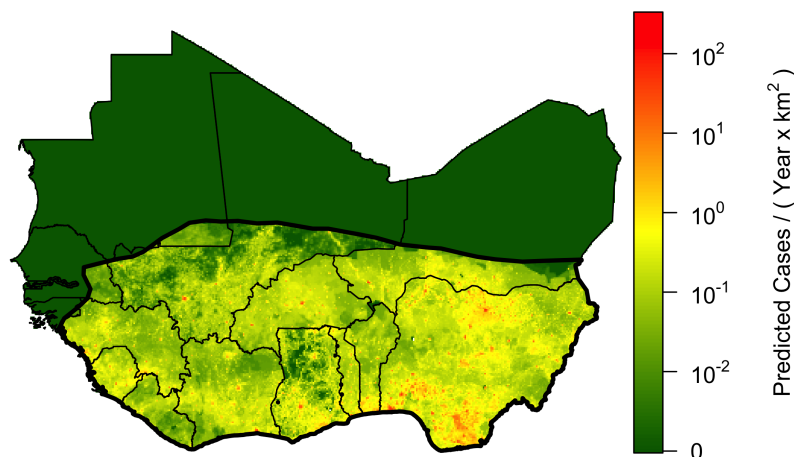

Figure 3: Predicted annual number of Lassa virus infections in humans, averaged over 25 bootstrap iterations. Red areas show regions with high population density that are also predicted to have high Lassa virus seroprevalence in humans.

| Country      | 1000's of Cases | Rate |
|--------------|-----------------|------|
| Nigeria      | 531.5           | 2.6  |
| Ghana        | 73.7            | 2.4  |
| Ivory Coast  | 64.4            | 2.5  |
| Niger        | 55.6            | 2.4  |
| Burkina Faso | 51.5            | 2.5  |
| Mali         | 49.3            | 2.5  |
| Guinea       | 46.4            | 3.3  |
| Benin        | 30.4            | 2.5  |
| Sierra Leone | 22.8            | 3.2  |
| Togo         | 20.5            | 2.5  |
| Liberia      | 12.8            | 2.5  |
| Mauritania   | 1.3             | 2.4  |
| Senegal      | 1.1             | 2.5  |

Table 1: Predicted annual number of asymptomatic and symptomatic Lassa virus cases in the study region, as well as infection rate (No. cases per year per 1000 people). Estimates in the table are derived assuming seroreversion and reinfection do not occur.

## 248 6 Discussion

249 Machine learning approaches that forecast the risk of emerging infectious disease  
250 have shown promise for revealing geographical ranges of emerging pathogens.  
251 Our forecasting framework ties together data from different aspects of spillover  
252 risk posed by the primary rodent reservoir of LASV, to the seroprevalence mea-  
253 sured in human serosurveys across West Africa. Using this approach, we are  
254 able to generate predictions of the number of new cases of LASV infection within  
255 different regions of West Africa. Our results indicate that Nigeria contributes  
256 the greatest number of new human cases each year, and that the magnitude of  
257 new cases in Nigeria is driven primarily by its greater human population den-  
258 sity, rather than an increased per-capita risk. If these predictions are correct,  
259 Nigeria is likely to represent the greatest risk of LASV emergence because the  
260 large number of annual spillover events allows for extensive sampling of viral  
261 strain diversity and repeated opportunities for viral adaptation to the human  
262 populations [29].

263 In addition to identifying the countries most at risk for viral emergence, our  
264 model provides updated estimates for the rate of LASV spillover across West  
265 Africa. Previous estimates of 100,000 – 300,000 cases per year were based on lon-  
266 gitudinal studies from communities in Sierra Leone conducted in the 1980's [16].  
267 Using seroprevalence data from studies across West Africa, our model predicts  
268 between 961,300 – 4,037,400 LASV infections in humans occur each year. Where  
269 the true value lies within this range depends on whether or not seroreversion and  
270 subsequent LASV reinfection are regular features of human LASV epidemiology,  
271 and reinforces the need to better understand the scope for LASV reinfection.  
272 It is important to realize that our predictions include both symptomatic and  
273 asymptomatic cases. Thus, because many human LASV infections result in mild  
274 flu-like symptoms or are asymptomatic, it is unsurprising that our predicted val-

275 ues exceed the reported number of confirmed LF cases in Nigeria [30, 31].

276 Several factors contribute to the discrepancy between previous estimates  
277 of LASV spillover, and our revised estimates. McCormick, Webb, and Krebs  
278 (1987) used seroconversion data from a 15 month period to infer a rate of LASV  
279 infection across West Africa. However, the population of West Africa has in-  
280 creased by a factor of 2.4 since that time, making these estimates outdated [32].  
281 Later estimates that were partially based on the same longitudinal serosurveys  
282 derived an upper bound of 13 million LASV infections, but only considered the  
283 number of cases in Nigeria, Guinea, and Sierra Leone [19]. Furthermore, these  
284 later estimates are derived from the maximum observed human LASV serocon-  
285 version rate in the Sierra Leone study, which likely does not apply across West  
286 Africa. In contrast, our estimates are based on human seroprevalence data that  
287 comes from six countries in West Africa and spans a 35 year time period. Be-  
288 cause our data-set was obtained from a broader spatial and temporal range, our  
289 estimates are less likely to be biased by sporadic extremes in LASV spillover.

290 By integrating spatial heterogeneity in Lassa risk and human density across  
291 West Africa our model allows us to predict which countries have the highest  
292 per-capita risk of LASV infection (e.g., Guinea, Sierra Leone) and those that  
293 have the highest number of human cases because of their large human popula-  
294 tion size (e.g., Nigeria). Clarifying and distinguishing these two different types  
295 of risk helps to plan and manage risk-reduction and behavior-change communi-  
296 cation campaigns, countermeasures such as rodent population management or  
297 vaccination of rodent reservoir hosts, and travel advisories to high risk areas.  
298 In addition to intervention strategies such as vaccination or management of ro-  
299 dent populations, both of these areas of West Africa should be prioritized for  
300 surveillance of LASV emergence in rodents and at-risk human populations.

301 Our modeling framework has the benefit of being extendable, thereby giving

302 structured insight into how other attributes of LASV risk translate into ob-  
303 served human seroprevalence. Future iterations of this framework could include  
304 the contributions of 1) more detailed life history of *M. natalensis*; 2) additional  
305 LASV animal reservoirs; and 3) genomic variability in LASV strains. For exam-  
306 ple, the first stage of these advanced models could include the temporal probabil-  
307 ity of a rodent being inside a domestic dwelling. The incidence of LF is generally  
308 believed to peak in the dry season, when *M. natalensis* migrate into domestic  
309 settings [33]. Temporal fluctuations in population density, due to seasonal rain-  
310 fall, would provide another important insight into the seasonal burden of human  
311 LF cases [10]. Understanding this ecological connection is important because  
312 distributing vaccines at seasonal population lows in wildlife demographic cycles  
313 can, in theory, substantially increase the probability of pathogen elimination  
314 [34, 35]. Incorporating these temporal layers will become more feasible as more  
315 time-series data on population density in the focal reservoir species becomes  
316 available.

317 Other potentially important risk layers that could be added are geographic  
318 distributions for other known reservoirs of LASV. Specifically, several species of  
319 rodents are known to be capable of harboring the virus [36]. Though *M. natal-*  
320 *ensis* is believed to be the primary reservoir that contributes to human infection,  
321 it is unknown whether this holds across all regions of West Africa. Understand-  
322 ing the relationship between the habitat suitability of different rodent reservoirs  
323 and human LF burden may also help determine whether *M. natalensis* is the  
324 host at which intervention strategies should always be directed. Finally, addi-  
325 tional virus sequence data could be used to train a risk layer that forecasts the  
326 presence or absence of specific genomic variants that are more likely to cause  
327 either severe disease or more efficient human-to-human transmission cycles.

328 Although the methods we have used here make efficient use of available data,

329 the accuracy of our risk forecasts remains difficult to rigorously evaluate due to  
330 the limited availability of reliable data from human populations across West  
331 Africa. The sparseness of human data arises for two reasons: 1) the lack of ro-  
332 bust surveillance and testing across much of the region where LASV is endemic  
333 and 2) the absence of publicly available databases reporting human cases in those  
334 countries that do have sophisticated surveillance in place. Improving surveil-  
335 lance for LASV across West Africa and developing publicly available resources  
336 for sharing the resulting data would allow more robust risk predictions to be  
337 developed and facilitate targeting effective risk reducing interventions. Despite  
338 these limitations of existing data, the structured machine-learning models we  
339 develop here provide insight into what aspects of environment, reservoir, and  
340 virus, contribute to spillover, and the potential risk of subsequent emergence  
341 into the human population. By understanding these connections, we can design  
342 and deploy more effective intervention and surveillance strategies that work in  
343 tandem to reduce disease burden and enhance global health security.

## 344 **7 Acknowledgements**

## 345 **8 Funding**

346 Funding was provided by DARPA grant no. D18AC00028 and NIH grant no.  
347 R01GM122079.

## 348 **References**

349 [1] Jones, K. E., Patel, N. G., Levy, M. A., Storeygard, A., Balk, D., Gittle-  
350 man, J. L. & Daszak, P., 2008 Global trends in emerging infectious diseases.  
351 *Nature* **451**, 990–993. (doi:10.1038/nature06536).



- 352 [2] Plowright, R. K., Parrish, C. R., McCallum, H., Hudson, P. J., Ko, A. I.,  
353 Graham, A. L. & Lloyd-Smith, J. O., 2017 Pathways to zoonotic spillover.  
354 *Nat. Rev. Microbiol.* **15**, 502—510. (doi:10.1038/nrmicro.2017.45).
- 355 [3] Hughes, J. M., Wilson, M. E., Pike, B. L., Saylor, K. E., Fair, J. N.,  
356 LeBreton, M., Tamoufe, U., Djoko, C. F., Rimoin, A. W. & Wolfe, N. D.,  
357 2010 The origin and prevention of pandemics. *Clin. Infect. Dis.* **50**, 1636–  
358 1640. (doi:10.1086/652860).
- 359 [4] Fichet-Calvet, E. & Rogers, D. J., 2009 Risk maps of Lassa fever in West  
360 Africa. *PLoS Negl. Trop. Dis.* **3**, e388. (doi:10.1371/journal.pntd.0000388).
- 361 [5] Mylne, A. Q., Pigott, D. M., Longbottom, J., Shearer, F., Duda, K. A.,  
362 Messina, J. P., Weiss, D. J., Moyes, C. L., Golding, N. & Hay, S. I., 2015  
363 Mapping the zoonotic niche of Lassa fever in Africa. *Trans. R. Soc. Trop.*  
364 *Med. Hyg.* **109**, 483–492. (doi:10.1093/trstmh/trv047).
- 365 [6] Pigott, D. M., Deshpande, A., Letourneau, I., Morozoff, C., Reiner Jr,  
366 R. C., Kraemer, M. U., Brent, S. E., Bogoch, I. I., Khan, K., Biehl, M. H.  
367 *et al.*, 2017 Local, national, and regional viral haemorrhagic fever pandemic  
368 potential in Africa: a multistage analysis. *Lancet* **390**, 2662–2672. (doi:  
369 10.1016/S0140-6736(17)32092-5).
- 370 [7] Pigott, D. M., Golding, N., Mylne, A., Huang, Z., Henry, A. J., Weiss,  
371 D. J., Brady, O. J., Kraemer, M. U., Smith, D. L., Moyes, C. L. *et al.*,  
372 2014 Mapping the zoonotic niche of Ebola virus disease in Africa. *Elife* **3**,  
373 e04395. (doi:10.7554/eLife.04395.001).
- 374 [8] Pigott, D. M., Bhatt, S., Golding, N., Duda, K. A., Battle, K. E., Brady,  
375 O. J., Messina, J. P., Balard, Y., Bastien, P., Pratslong, F. *et al.*, 2014  
376 Global distribution maps of the leishmaniasis. *Elife* **3**, e02851. (doi:10.  
377 7554/eLife.02851.001).

- 378 [9] Bond, N., Schieffelin, J. S., Moses, L. M., Bennett, A. J. & Bausch, D. G.,  
379 2013 A historical look at the first reported cases of Lassa fever: IgG anti-  
380 bodies 40 years after acute infection. *Am. J. Trop. Med. Hyg.* **88**, 241–244.  
381 (doi:10.4269/ajtmh.12-0466).
- 382 [10] Gibb, R., Moses, L. M., Redding, D. W. & Jones, K. E., 2017 Understand-  
383 ing the cryptic nature of Lassa fever in West Africa. *Pathog. Glob. Health.*  
384 **111**, 276–288. (doi:10.1080/20477724.2017.1369643).
- 385 [11] Peterson, T. A., Moses, L. M. & Bausch, D. G., 2014 Mapping transmis-  
386 sion risk of Lassa fever in West Africa: the importance of quality con-  
387 trol, sampling bias, and error weighting. *PLoS One* **9**, e100711. (doi:  
388 10.1371/journal.pntd.0000388).
- 389 [12] Maes, P., Alkhovsky, S. V., Bào, Y., Beer, M., Birkhead, M., Briese, T.,  
390 Buchmeier, M. J., Calisher, C. H., Charrel, R. N., Choi, I. R. *et al.*, 2018  
391 Taxonomy of the family Arenaviridae and the order Bunyavirales: update  
392 2018. *Arch. Virol.* **163**, 2295–2310. (doi:10.1007/s00705-018-3843-5).
- 393 [13] Fisher-Hoch, S., Tomori, O., Nasidi, A., Perez-Oronoz, G., Fakile, Y., Hut-  
394 wagner, L. & McCormick, J., 1995 Review of cases of nosocomial Lassa  
395 fever in Nigeria: the high price of poor medical practice. *BMJ* **311**, 857–  
396 859. (doi:10.1136/bmj.311.7009.857).
- 397 [14] Iacono, G. L., Cunningham, A. A., Fichet-Calvet, E., Garry, R. F., Grant,  
398 D. S., Khan, S. H., Leach, M., Moses, L. M., Schieffelin, J. S., Shaffer,  
399 J. G. *et al.*, 2015 Using modelling to disentangle the relative contributions  
400 of zoonotic and anthroponotic transmission: the case of Lassa fever. *PLoS*  
401 *Neql. Trop. Dis.* **9**, e3398. (doi:10.1371/journal.pntd.0003398).
- 402 [15] Ter Meulen, J., Lukashevich, I., Sidibe, K., Inapogui, A., Marx, M., Dor-  
403 lemman, A., Yansane, M., Koulemou, K., Chang-Claude, J. & Schmitz,

- 404 H., 1996 Hunting of peridomestic rodents and consumption of their meat  
405 as possible risk factors for rodent-to-human transmission of Lassa virus  
406 in the Republic of Guinea. *Am. J. Trop. Med. Hyg.* **55**, 661–666. (doi:  
407 10.4269/ajtmh.1996.55.661).
- 408 [16] McCormick, J. B., Webb, P. A., Krebs, J. W., Johnson, K. M. & Smith,  
409 E. S., 1987 A prospective study of the epidemiology and ecology of Lassa  
410 fever. *J. Infect. Dis.* **155**, 437–444. (doi:10.1093/infdis/155.3.437).
- 411 [17] Ogbu, O., Ajuluchukwu, E., Uneke, C. *et al.*, 2007 Lassa fever in West  
412 African sub-region: an overview. *J. Vector Borne Dis.* **44**, 1–11.
- 413 [18] Brosh-Nissimov, T., 2016 Lassa fever: another threat from West Africa.  
414 *Disaster and Mil. Med.* **2**, 8. (doi:10.1186/s40696-016-0018-3).
- 415 [19] Richmond, J. K. & Baglolle, D. J., 2003 Lassa fever: epidemiology, clinical  
416 features, and social consequences. *BMJ* **327**, 1271–1275. (doi:10.1136/  
417 bmj.327.7426.1271).
- 418 [20] Granjon, L., 2016 The IUCN red list of threatened species  
419 2016: e.T12868A115107375 (doi:10.2305/IUCN.UK.2016-3.RLTS.  
420 T12868A22425266.en). Downloaded on 10 December 2019.
- 421 [21] Hastie, T., Tibshirani, R. & Friedman, J., 2009 *The elements of statisti-*  
422 *cal learning: data mining, inference, and prediction.* Springer Science &  
423 Business Media.
- 424 [22] Elith, J., Leathwick, J. R. & Hastie, T., 2008 A working guide to boosted  
425 regression trees. *J Anim. Ecol.* **77**, 802–813. (doi:10.1111/j.1365-2656.2008.  
426 01390.x).
- 427 [23] Elith, J., Graham, C. H., Anderson, R. P., Dudík, M., Ferrier, S., Guisan,  
428 A., Hijmans, R. J., Huettmann, F., Leathwick, J. R., Lehmann, A. *et al.*,

- 429 2006 Novel methods improve prediction of species' distributions from occur-  
430 rence data. *Ecography* **29**, 129–151. (doi:10.1111/j.2006.0906-7590.04596.  
431 x).
- 432 [24] Barbet-Massin, M., Jiguet, F., Albert, C. H. & Thuiller, W., 2012 Select-  
433 ing pseudo-absences for species distribution models: how, where and how  
434 many? *Methods Ecol. Evol.* **3**, 327–338. (doi:10.1111/j.2041-210X.2011.  
435 00172.x).
- 436 [25] Phillips, S. J., Dudík, M., Elith, J., Graham, C. H., Lehmann, A., Leath-  
437 wick, J. & Ferrier, S., 2009 Sample selection bias and presence-only dis-  
438 tribution models: implications for background and pseudo-absence data.  
439 *Ecol. Appl.* **19**, 181–197. (doi:10.1890/07-2153.1).
- 440 [26] GBIF occurrence download, 2020-01-22. <https://doi.org/10.15468/d1.pqbckb>.  
441
- 442 [27] Hijmans, R. J., Phillips, S., Leathwick, J. & Elith, J., 2017 *dismo: Species*  
443 *Distribution Modeling*. R package version 1.1-4.
- 444 [28] McCullagh, P. & Nelder, J. A., 1989 *Generalized linear models*. CRC Press,  
445 2 edition.
- 446 [29] Antia, R., Regoes, R. R., Koella, J. C. & Bergstrom, C. T., 2003 The role  
447 of evolution in the emergence of infectious diseases. *Nature* **426**, 658–661.  
448 (doi:10.1038/nature02104).
- 449 [30] CDC, 2020. NCDC Lassa cases. <https://ncdc.gov.ng/data>. Accessed:  
450 2019-02-11.
- 451 [31] Yun, N. E. & Walker, D. H., 2012 Pathogenesis of Lassa fever. *Viruses* **4**,  
452 2031–2048. (doi:10.3390/v4102031).

- 453 [32] Worldometers.info. Dover, Delaware, U.S.A.. Retrieved 03-03-  
454 20 from [https://www.worldometers.info/world-population/western-africa-](https://www.worldometers.info/world-population/western-africa-population/)  
455 [population/](https://www.worldometers.info/world-population/western-africa-population/).
- 456 [33] Fichet-Calvet, E., Lecompte, E., Koivogui, L., Soropogui, B., Doré, A.,  
457 Kourouma, F., Sylla, O., Daffis, S., Koulémou, K. & Meulen, J. T., 2007  
458 Fluctuation of abundance and Lassa virus prevalence in *Mastomys natal-*  
459 *ensis* in Guinea, West Africa. *Vector Borne Zoonotic Dis.* **7**, 119–128.  
460 (doi:10.1089/vbz.2006.0520).
- 461 [34] Schreiner, C. L., Nuismer, S. L. & Basinski, A. J., 2020 When to vaccinate  
462 a fluctuating wildlife population: is timing everything? *J. Appl. Ecol.*  
463 (doi:10.1111/1365-2664.13539).
- 464 [35] Nuismer, S. L., Remien, C. H., Basinski, A. J., Varrelman, T., Layman,  
465 N., Rosenke, K., Bird, B., Jarvis, M., Barry, P. & Fichet-Calvet, E., 2019  
466 Bayesian estimation of Lassa virus epidemiological parameters: implica-  
467 tions for spillover prevention using wildlife vaccination. *bioRxiv* p. 841403.  
468 (doi:10.1101/841403).
- 469 [36] Fichet-Calvet, E., Becker-Ziaja, B., Koivogui, L. & Günther, S., 2014 Lassa  
470 serology in natural populations of rodents and horizontal transmission. *Vec-*  
471 *tor Borne Zoonotic Dis.* **14**, 665–674. (doi:10.1089/vbz.2013.1484).
